# Supplementary material
Source: Springer Nature journal article supplement (https://www.springermedizin.de/resource/supplementary/12911_2013_774_MOESM4_ESM.pdf/9526626)

1. Point-of-care  
(24 cases)

2. Data collection and  
disease surveillance  
(3 cases)

3. Treatment  
compliance  
(2 cases)

4. Distant medical  
education  
(3 cases)

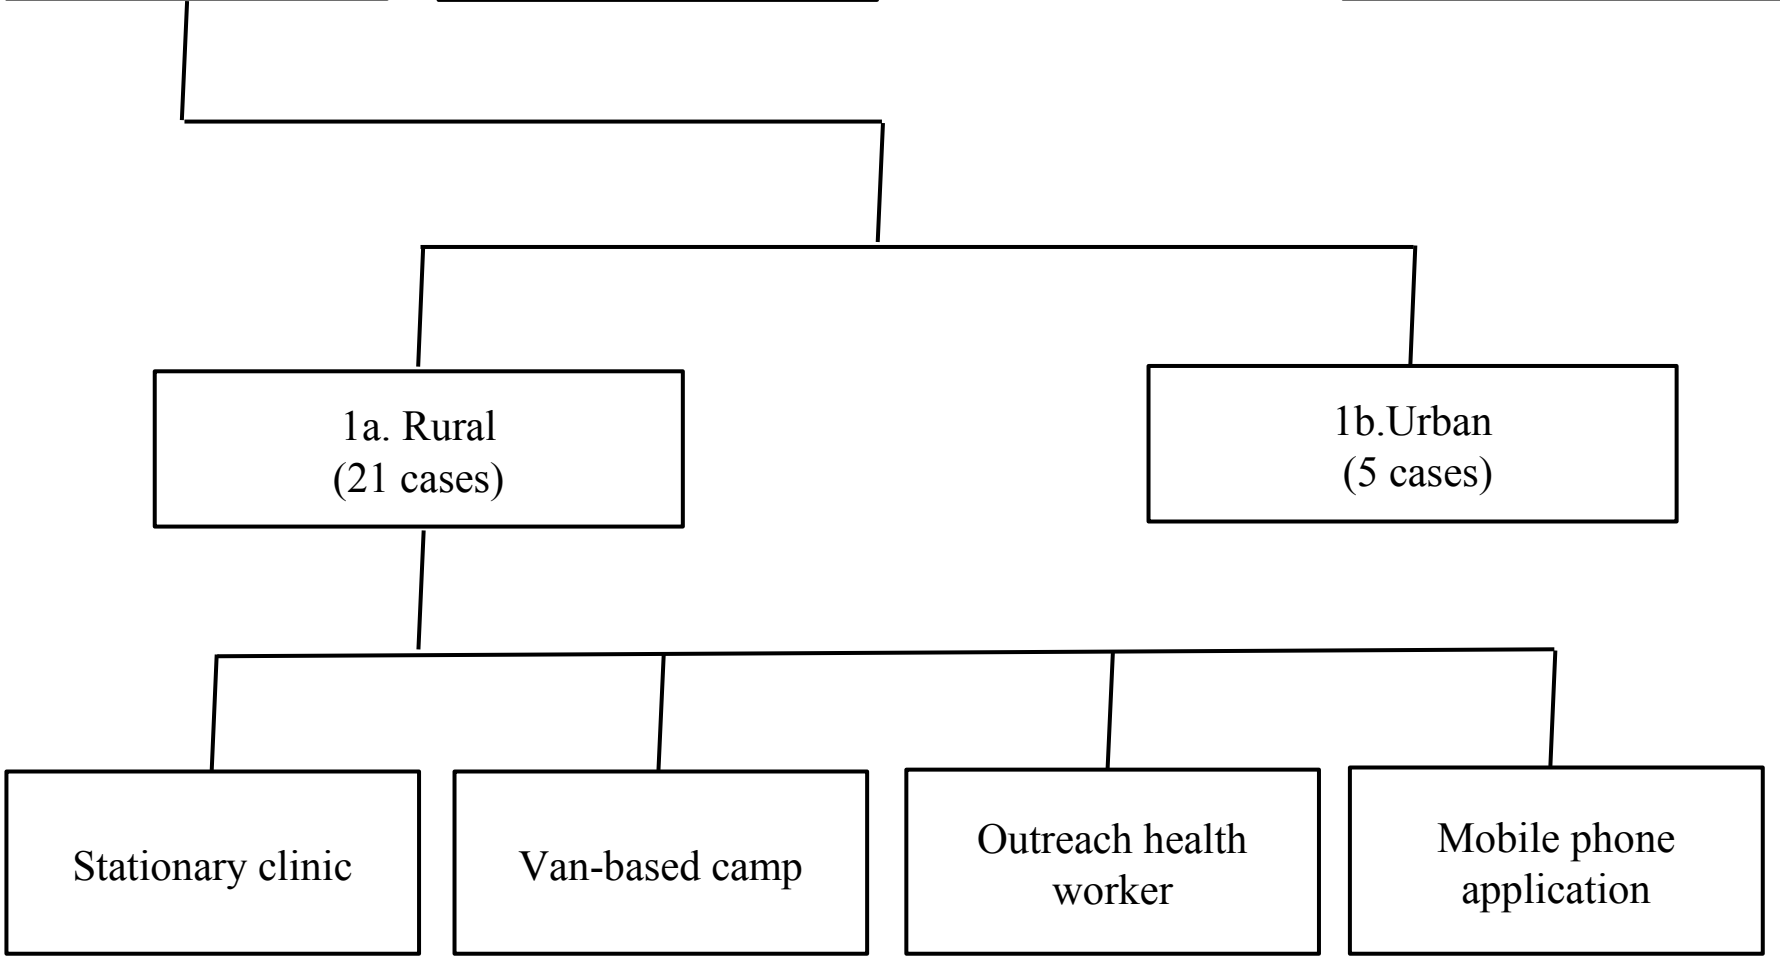

Supplement: MOESM4 [file 9526626]
